# Supplementary material for: Serum stress responsive gene EhslncRNA of Entamoeba histolytica is a novel long noncoding RNA
Source: PubMed Central journal article supplement (PMC4895391; doi:10.1038/srep27476), 2016-06-07
Supplement: srep27476-s1.pdf [file srep27476-s1.pdf]

**Supplementary information**

**Serum stress responsive gene EhsIncRNA of *Entamoeba histolytica* is a novel long non coding RNA**

**Arpita Saha<sup>1</sup>, Sudha Bhattacharya<sup>2</sup>, Alok Bhattacharya<sup>1</sup>**

<sup>1</sup> School of Life Sciences, Jawaharlal Nehru University, New Delhi, India

<sup>2</sup> School of Environmental Sciences, Jawaharlal Nehru University, New Delhi, India

>gb|DS571171.1|:11243-13723 *Entamoeba histolytica* HM-1:IMSS scf\_1104750517413  
genomic scaffold, whole genome shotgun sequence Frame 1

1 AGA GAT TTA AAA AAT AAA TGA TAT GAT GTC TAA ATA AAA ATA GAA 45  
1 Arg Asp Leu Lys Asn Lys **End** Tyr Asp Val **End** Ile Lys Ile Glu 15

46 AAT TGA TAT TTT ATT TTT ATG AAA ATA ACG AGT ATA ATC TAT GAG 90  
16 Asn **End** Tyr Phe Ile Phe Met Lys Ile Thr Ser Ile Ile Tyr Glu 30

91 ATT ATT CAT TTC ATT ATT GTC AAT TTT ATT ATT AAT GTC AAA CCA 135  
31 Ile Ile His Phe Ile Ile Val Asn Phe Ile Ile Asn Val Lys Pro 45

136 CAC TTT ATG ACA GAA GAA GTA ATT TTT TCA TTA AAT TAA ACT AAT 180  
46 His Phe Met Thr Glu Glu Val Ile Phe Ser Leu Asn **End** Thr Asn 60

181 GTT AAA TCC TCG ATA AAT TAA TTT TTA ATT TCC TAA GTC AAT ATA 225  
61 Val Lys Ser Ser Ile Asn **End** Phe Leu Ile Ser **End** Val Asn Ile 75

226 ATA AAT ATT CTT CAT TTT GGT GAT ATG AGA AGA AAT TAT ACA TTT 270  
76 Ile Asn Ile Leu His Phe Gly Asp Met Arg Arg Asn Tyr Thr Phe 90

271 TTT AAG AAG ATT GGT AAA CGC CAT TAT GTG ATG AAT AGT ACA TTT 315  
91 Phe Lys Lys Ile Gly Lys Arg His Tyr Val Met Asn Ser Thr Phe 105

316 TAA AAC TTT ATG TCT TTC AAT TTC TGT TAG TCA GTT AAG TGA AAC 360  
106 **End** Asn Phe Met Ser Phe Asn Phe Cys **End** Ser Val Lys **End** Asn 120

361 AAT GTT ATT TTA TAA ATT AAT ATT ATT TTC TAT AAG ATA TTG CCA 405  
121 Asn Val Ile Leu **End** Ile Asn Ile Ile Phe Tyr Lys Ile Leu Pro 135

406 TAT TAA TAA ACA ATG GAA TTT TCA TTT TAT TGA ACT TTA AGA GAA 450  
136 Tyr **EndEnd** Thr Met Glu Phe Ser Phe Tyr **End** Thr Leu Arg Glu 150

451 CAA AGA TTA ATT AGA GTA TAT GTA TTT AAA AGA CTA AAT GTT GGT 495  
151 Gln Arg Leu Ile Arg Val Tyr Val Phe Lys Arg Leu Asn Val Gly 165

496 GGT AAG AGT TTT TTA GAA AAG AGT TAA TTA ACT CAA AGG TAT TGA  
540  
166 Gly Lys Ser Phe Leu Glu Lys Ser **End** Leu Thr Gln Arg Tyr **End** 180

541 AGA AAG AAG TGT TTT GAA TAA CTT CAT TGT ATT GGT AGT TAA TTA  
585  
181 Arg Lys Lys Cys Phe Glu **End** Leu His Cys Ile Gly Ser **End** Leu 195

586 AAA TGA AAT AAA AGA CTC TCG TTA TAA GTA GGA AGA TGA AGA GCA  
630  
196 Lys **End** Asn Lys Arg Leu Ser Leu **End** Val Gly Arg **End** Arg Ala 210

631 ACA TTC ATT AGA AAA ATT GAT TTC ATT GCA TAA TAT TAT TTA TTG 675  
211 Thr Phe Ile Arg Lys Ile Asp Phe Ile Ala **End** Tyr Tyr Leu Leu 225

676 AAT AAT TTT TTA ATT CTT CTA TCA TAA AAA ATA CAA AAA AAT GAA 720  
226 Asn Asn Phe Leu Ile Leu Leu Ser **End** Lys Ile Gln Lys Asn Glu 240

721 TAA ATT CAA TAA TAT AAT AAA TCT CAT TTA GAA AAA GTA TAG TGC  
765  
241 **End** Ile Gln **End** Tyr Asn Lys Ser His Leu Glu Lys Val **End** Cys 255

766 AGG AAC AAA ACG AGT ATT TCC ATT AAA ACC AAC AAA TGT CTG TGG  
810  
256 Arg Asn Lys Thr Ser Ile Ser Ile Lys Thr Asn Lys Cys Leu Trp 270

811 TTG TAT CAC TAA TTC TCT ACA CAT AGG ACA TCT TGG TTG TTG AAT  
855  
271 Leu Tyr His **End** Phe Ser Thr His Arg Thr Ser Trp Leu Leu Asn 285

856 AAG CCA TTT AAA AAT ACA TTC TTC ACA ATA AAC ATG ACC ACA TTT  
900  
286 Lys Pro Phe Lys Asn Thr Phe Phe Thr Ile Asn Met Thr Thr Phe 300

901 TAA CTT AAT TGG ACG ATT AAC TGT GTC TTG ACA AAT TAA GCA CAT  
945  
301 **End** Leu Asn Trp Thr Ile Asn Cys Val Leu Thr Asn **End** Ala His 315

946 TTT GTC TTC TAA TGA ATC TAC GGT TAC TGA AGT ACC AAA CAT ATT  
990  
316 Phe Val Phe **EndEnd** Ile Tyr Gly Tyr **End** Ser Thr Lys His Ile 330

991 GTT TTG AGT GAA AAA GGT TTT AAG AAC TTT AAA GAA ACA AGA AAG  
1035  
331 Val Leu Ser Glu Lys Gly Phe Lys Asn Phe Lys Glu Thr Arg Lys 345

1036 AAA ATT AAC AAA TCC AAG ACA ACG TTC AAA CAC ATA AAG CCA CGT  
1080

346 Lys Ile Asn Lys Ser Lys Thr Thr Phe Lys His Ile Lys Pro Arg 360

1081 TAT TGG ATA TAT AAC AAT ATA ACT AAT CCA TTG GTT GGT TAT TGA  
1125

361 Tyr Trp Ile Tyr Asn Asn Ile Thr Asn Pro Leu Val Gly Tyr **End** 375

1126 AGT GTA TGA AAT AAG ATA ATT ATA AAT AAT AAA AGT AGG AAG AAT  
1170

376 Ser Val **End** Asn Lys Ile Ile Ile Asn Asn Lys Ser Arg Lys Asn 390

1171 AAC TCT TAT AGA CAA AGT AAG TGA TTC TAT CAT AGA GAG TAA TTT  
1215

391 Asn Ser Tyr Arg Gln Ser Lys **End** Phe Tyr His Arg Glu **End** Phe 405

1216 ACA TAA TAA TAA TAT ATT TTT AAC TAA AAA TAT TGT TAA AAC TTT  
1260

406 Thr **EndEndEnd** Tyr Ile Phe Asn **End** Lys Tyr Cys **End** Asn Phe 420

1261 TAG ATA ATA ATT TAT ATA ACG GTA AAT ACA GTC ACA TAG ATA TAA  
1305

421 **End** Ile Ile Ile Tyr Ile Thr Val Asn Thr Val Thr **End** Ile **End** 435

1306 ATA AAT GAA TAA ATC ACT AAA AGA ATT TGG AAT AAC AGT AAT ATC  
1350

436 Ile Asn Glu **End** Ile Thr Lys Arg Ile Trp Asn Asn Ser Asn Ile 450

1351 TAT CAT ATC AGT TAT TCC TAT TTG CCA CAC CTT TAT AAT AAA TAA  
1395

451 Tyr His Ile Ser Tyr Ser Tyr Leu Pro His Leu Tyr Asn Lys **End** 465

1396 TAA CAT AGA AGG AAT ACA ATA AAC TAA TAT CCT TAT TTT ATT TTC  
1440

466 End His Arg Arg Asn Thr Ile Asn **End** Tyr Pro Tyr Phe Ile Phe 480

1441 CCC AGT ATT TAC ATA TTG TGT AAC TAA CTC AGT TAA ATG ATA ATG  
1485

481 Pro Ser Ile Tyr Ile Leu Cys Asn **End** Leu Ser **End** Met Ile Met 495

1486 TTG AAT GAA ATC AAC TAT AAT AAA TAA AGT ATA AAA AAT ATG ACT  
1530

496 Leu Asn Glu Ile Asn Tyr Asn Lys **End** Ser Ile Lys Asn Met Thr 510

1531 AAA GAA AAA GAA TAA TAT AAC TAC TAT ATA AGA CCC AAA ACC TGA  
1575

511 Lys Glu Lys Glu **End** Tyr Asn Tyr Tyr Ile Arg Pro Lys Thr **End** 525

1576 ATC ATA ATC ATT ATT TAT ATA ATC ATT ATC ACC ATC ATT ATT ATT  
1620

526 Ile Ile Ile Ile Ile Tyr Ile Ile Ile Ile Thr Ile Ile Ile Ile 540

1621 ATT ATT TTG GTT GTT TGG TTG TTG TTC ATT TCC TGT ATG AGG TAC  
1665

541 Ile Ile Leu Val Val Trp Leu Leu Phe Ile Ser Cys Met Arg Tyr 555

1666 TTC ATT TAA TTG AGT TAA ACC TTC TTC TCT CAA ATT AAC TTC ATG  
1710

556 Phe Ile **End** Leu Ser **End** Thr Phe Phe Ser Gln Ile Asn Phe Met 570

1711 TTC ATC AAC ATT TCC CAT TTC AAT TTC GTG TTC AAA TTT TGT GTC  
1755

571 Phe Ile Asn Ile Ser His Phe Asn Phe Val Phe Lys Phe Cys Val 585

1756 TTG GTT TTC ATT AGT ATT TAA TGA ATT TAT ATG ATT ATT TTC ATG  
1800

586 Leu Val Phe Ile Ser Ile **EndEnd** Ile Tyr Met Ile Ile Phe Met 600

1801 AGT GTC TAT ACA ACT CAA TTT ATT TGT ACA GAC AAT ATC ACT ATC  
1845

601 Ser Val Tyr Thr Thr Gln Phe Ile Cys Thr Asp Asn Ile Thr Ile 615

1846 ACA TTC TTT TTC TGT TTT CTG TTT ATT AAG ATG TTC TTC AGT TTG  
1890

616 Thr Phe Phe Phe Cys Phe Leu Phe Ile Lys Met Phe Phe Ser Leu 630

1891 TGA CAT TTA AGT GAT TTT ATA GTA TTT TTT TGT AAA CTT TTT AGA  
1935

631 **End** His Leu Ser Asp Phe Ile Val Phe Phe Cys Lys Leu Phe Arg 645

1936 AAT AAA AAA TGA GCA GAA ACA GAA TAT CAA AAA CCC TTT ATT ATT  
1980

646 Asn Lys Lys **End** Ala Glu Thr Glu Tyr Gln Lys Pro Phe Ile Ile 660

1981 TAT TCT TAA TCA AAT CAA CCA TCT CCT CAA TTG TTA TCT CAT TAA  
2025

661 Tyr Ser **End** Ser Asn Gln Pro Ser Pro Gln Leu Leu Ser His **End** 675

2026 ATG TGT GAA TTG CCA GGT TGC ATC CTT TAA TTT GAA GTA ATT CAT  
2070

676 Met Cys Glu Leu Pro Gly Cys Ile Leu **End** Phe Glu Val Ile His 690

2071 TAA CAG TCA TTT CTG AGG CAA TTC CTA TTG GAG TAG CAC CAG CTG  
2115

691 **End** Gln Ser Phe Leu Arg Gln Phe Leu Leu Glu **End** His Gln Leu 705

2116 ATA ATG CAG AAT GAA TAC CTG AAA TAG TAT CTT CAA ATA CAA TAC  
2160

706 Ile Met Gln Asn Glu Tyr Leu Lys **End** Tyr Leu Gln Ile Gln Tyr 720

2161 AAT GAG AAA TAC TAA CTC CTA ATT TCT TAG AAG CTT TTA AAT AAA  
2205

721 Asn Glu Lys Tyr **End** Leu Leu Ile Ser **End** Lys Leu Leu Asn Lys 735

2206 TGT CAG GAG CAG GTT TAC CTT TAA AAG TAA AAT CAT TAA AAA TAA  
2250

736 Cys Gln Glu Gln Val Tyr Leu **End** Lys **End** Asn His **End** Lys **End** 750

2251 TTT TAT CAA TAT CAA ACC ATT CTT CCA AGT GGT ATT TTT GAA TAA  
2295

751 Phe Tyr Gln Tyr Gln Thr Ile Leu Pro Ser Gly Ile Phe Glu **End** 765

2296 ACA CTT GAA CAT TTC CCC AAT CAC TTG AAG TGG CAA TAG TAA AAG  
2340

766 Thr Leu Glu His Phe Pro Asn His Leu Lys Trp Gln **EndEnd** Lys 780

2341 GAA TAT TAC ATT TTT TTA ATG CCT CAA AAA GAT TAA TTG CAC CAT  
2385

781 Glu Tyr Tyr Ile Phe Leu Met Pro Gln Lys Asp **End** Leu His His 795

2386 CAC ATA ATT TTA TAT CAC TTT TCA TTA ACA TAG TTC TAT ATA AAT  
2430

796 His Ile Ile Leu Tyr His Phe Ser Leu Thr **End** Phe Tyr Ile Asn 810

2431 TTT CTT TTT CTT CAG CAT ATT TCT TTG CAT CTT CAT CAC TTA TTT 2475  
811 Phe Leu Phe Leu Gln His Ile Ser Leu His Leu His His Leu Phe 825

2476 CTT TAT 2481

826 Leu Tyr

>gb|DS571171.1|:11243-13723 *Entamoeba histolytica* HM-1:IMSS scf\_1104750517413  
genomic scaffold, whole genome shotgun sequence Frame 2

2 GAG ATT TAA AAA ATA AAT GAT ATG ATG TCT AAA TAA AAA TAG AAA 46  
1 Glu Ile **End** Lys Ile Asn Asp Met Met Ser Lys **End** Lys **End** Lys 15

47 ATT GAT ATT TTA TTT TTA TGA AAA TAA CGA GTA TAA TCT ATG AGA 91

16 Ile Asp Ile Leu Phe Leu **End** Lys End Arg Val **End** Ser Met Arg 30

92 TTA TTC ATT TCA TTA TTG TCA ATT TTA TTA TTA ATG TCA AAC CAC 136  
31 Leu Phe Ile Ser Leu Leu Ser Ile Leu Leu Leu Met Ser Asn His 45

137 ACT TTA TGA CAG AAG AAG TAA TTT TTT CAT TAA ATT AAA CTA ATG  
181  
46 Thr Leu **End** Gln Lys Lys **End** Phe Phe His **End** Ile Lys Leu Met 60

182 TTA AAT CCT CGA TAA ATT AAT TTT TAA TTT CCT AAG TCA ATA TAA 226  
61 Leu Asn Pro Arg **End** Ile Asn Phe **End** Phe Pro Lys Ser Ile **End** 75

227 TAA ATA TTC TTC ATT TTG GTG ATA TGA GAA GAA ATT ATA CAT TTT 271  
76 **End** Ile Phe Phe Ile Leu Val Ile **End** Glu Glu Ile Ile His Phe 90

272 TTA AGA AGA TTG GTA AAC GCC ATT ATG TGA TGA ATA GTA CAT TTT  
316  
91 Leu Arg Arg Leu Val Asn Ala Ile Met **End End** Ile Val His Phe 105

317 AAA ACT TTA TGT CTT TCA ATT TCT GTT AGT CAG TTA AGT GAA ACA  
361  
106 Lys Thr Leu Cys Leu Ser Ile Ser Val Ser Gln Leu Ser Glu Thr 120

362 ATG TTA TTT TAT AAA TTA ATA TTA TTT TCT ATA AGA TAT TGC CAT 406  
121 Met Leu Phe Tyr Lys Leu Ile Leu Phe Ser Ile Arg Tyr Cys His 135

407 ATT AAT AAA CAA TGG AAT TTT CAT TTT ATT GAA CTT TAA GAG AAC  
451  
136 Ile Asn Lys Gln Trp Asn Phe His Phe Ile Glu Leu **End** Glu Asn 150

452 AAA GAT TAA TTA GAG TAT ATG TAT TTA AAA GAC TAA ATG TTG GTG  
496  
151 Lys Asp **End** Leu Glu Tyr Met Tyr Leu Lys Asp **End** Met Leu Val 165

497 GTA AGA GTT TTT TAG AAA AGA GTT AAT TAA CTC AAA GGT ATT GAA  
541  
166 Val Arg Val Phe **End** Lys Arg Val Asn **End** Leu Lys Gly Ile Glu 180

542 GAA AGA AGT GTT TTG AAT AAC TTC ATT GTA TTG GTA GTT AAT TAA  
586  
181 Glu Arg Ser Val Leu Asn Asn Phe Ile Val Leu Val Val Asn **End** 195

587 AAT GAA ATA AAA GAC TCT CGT TAT AAG TAG GAA GAT GAA GAG CAA  
631  
196 Asn Glu Ile Lys Asp Ser Arg Tyr Lys **End** Glu Asp Glu Glu Gln 210

632 CAT TCA TTA GAA AAA TTG ATT TCA TTG CAT AAT ATT ATT TAT TGA 676  
211 His Ser Leu Glu Lys Leu Ile Ser Leu His Asn Ile Ile Tyr **End** 225

677 ATA ATT TTT TAA TTC TTC TAT CAT AAA AAA TAC AAA AAA ATG AAT 721  
226 Ile Ile Phe **End** Phe Phe Tyr His Lys Lys Tyr Lys Lys Met Asn 240

722 AAA TTC AAT AAT ATA ATA AAT CTC ATT TAG AAA AAG TAT AGT GCA  
766  
241 Lys Phe Asn Asn Ile Ile Asn Leu Ile **End** Lys Lys Tyr Ser Ala 255

767 GGA ACA AAA CGA GTA TTT CCA TTA AAA CCA ACA AAT GTC TGT GGT  
811  
256 Gly Thr Lys Arg Val Phe Pro Leu Lys Pro Thr Asn Val Cys Gly 270

812 TGT ATC ACT AAT TCT CTA CAC ATA GGA CAT CTT GGT TGT TGA ATA  
856  
271 Cys Ile Thr Asn Ser Leu His Ile Gly His Leu Gly Cys **End** Ile 285

857 AGC CAT TTA AAA ATA CAT TCT TCA CAA TAA ACA TGA CCA CAT TTT  
901  
286 Ser His Leu Lys Ile His Ser Ser Gln **End** Thr **End** Pro His Phe 300

902 AAC TTA ATT GGA CGA TTA ACT GTG TCT TGA CAA ATT AAG CAC ATT  
946  
301 Asn Leu Ile Gly Arg Leu Thr Val Ser **End** Gln Ile Lys His Ile 315

947 TTG TCT TCT AAT GAA TCT ACG GTT ACT GAA GTA CCA AAC ATA TTG  
991  
316 Leu Ser Ser Asn Glu Ser Thr Val Thr Glu Val Pro Asn Ile Leu 330

992 TTT TGA GTG AAA AAG GTT TTA AGA ACT TTA AAG AAA CAA GAA AGA  
1036  
331 Phe **End** Val Lys Lys Val Leu Arg Thr Leu Lys Lys Gln Glu Arg 345

1037 AAA TTA ACA AAT CCA AGA CAA CGT TCA AAC ACA TAA AGC CAC GTT  
1081  
346 Lys Leu Thr Asn Pro Arg Gln Arg Ser Asn Thr **End** Ser His Val 360

1082 ATT GGA TAT ATA ACA ATA TAA CTA ATC CAT TGG TTG GTT ATT GAA  
1126  
361 Ile Gly Tyr Ile Thr Ile **End** Leu Ile His Trp Leu Val Ile Glu 375

1127 GTG TAT GAA ATA AGA TAA TTA TAA ATA ATA AAA GTA GGA AGA ATA  
1171  
376 Val Tyr Glu Ile Arg **End** Leu **End** Ile Ile Lys Val Gly Arg Ile 390



1172 ACT CTT ATA GAC AAA GTA AGT GAT TCT ATC ATA GAG AGT AAT TTA  
1216

391 Thr Leu Ile Asp Lys Val Ser Asp Ser Ile Ile Glu Ser Asn Leu 405

1217 CAT AAT AAT AAT ATA TTT TTA ACT AAA AAT ATT GTT AAA ACT TTT  
1261

406 His Asn Asn Asn Ile Phe Leu Thr Lys Asn Ile Val Lys Thr Phe 420

1262 AGA TAA TAA TTT ATA TAA CGG TAA ATA CAG TCA CAT AGA TAT AAA  
1306

421 Arg **End End** Phe Ile **End Arg End** Ile Gln Ser His Arg Tyr Lys 435

1307 TAA ATG AAT AAA TCA CTA AAA GAA TTT GGA ATA ACA GTA ATA TCT  
1351

436 **End** Met Asn Lys Ser Leu Lys Glu Phe Gly Ile Thr Val Ile Ser 450

1352 ATC ATA TCA GTT ATT CCT ATT TGC CAC ACC TTT ATA ATA AAT AAT  
1396

451 Ile Ile Ser Val Ile Pro Ile Cys His Thr Phe Ile Ile Asn Asn 465

1397 AAC ATA GAA GGA ATA CAA TAA ACT AAT ATC CTT ATT TTA TTT TCC  
1441

466 Asn Ile Glu Gly Ile Gln **End** Thr Asn Ile Leu Ile Leu Phe Ser 480

1442 CCA GTA TTT ACA TAT TGT GTA ACT AAC TCA GTT AAA TGA TAA TGT  
1486

481 Pro Val Phe Thr Tyr Cys Val Thr Asn Ser Val Lys **End End** Cys 495

1487 TGA ATG AAA TCA ACT ATA ATA AAT AAA GTA TAA AAA ATA TGA CTA  
1531

496 **End** Met Lys Ser Thr Ile Ile Asn Lys Val **End** Lys Ile **End** Leu 510

1532 AAG AAA AAG AAT AAT ATA ACT ACT ATA TAA GAC CCA AAA CCT GAA  
1576

511 Lys Lys Lys Asn Asn Ile Thr Thr Ile **End** Asp Pro Lys Pro Glu 525

1577 TCA TAA TCA TTA TTT ATA TAA TCA TTA TCA CCA TCA TTA TTA TTA  
1621

526 Ser **End** Ser Leu Phe Ile **End** Ser Leu Ser Pro Ser Leu Leu Leu 540

1622 TTA TTT TGG TTG TTT GGT TGT TGT TCA TTT CCT GTA TGA GGT ACT  
1666

541 Leu Phe Trp Leu Phe Gly Cys Cys Ser Phe Pro Val **End** Gly Thr 555

1667 TCA TTT AAT TGA GTT AAA CCT TCT TCT CTC AAA TTA ACT TCA TGT  
1711

556 Ser Phe Asn **End** Val Lys Pro Ser Ser Leu Lys Leu Thr Ser Cys 570

1712 TCA TCA ACA TTT CCC ATT TCA ATT TCG TGT TCA AAT TTT GTG TCT  
1756

571 Ser Ser Thr Phe Pro Ile Ser Ile Ser Cys Ser Asn Phe Val Ser 585

1757 TGG TTT TCA TTA GTA TTT AAT GAA TTT ATA TGA TTA TTT TCA TGA  
1801

586 Trp Phe Ser Leu Val Phe Asn Glu Phe Ile **End** Leu Phe Ser **End** 600

1802 GTG TCT ATA CAA CTC AAT TTA TTT GTA CAG ACA ATA TCA CTA TCA  
1846

601 Val Ser Ile Gln Leu Asn Leu Phe Val Gln Thr Ile Ser Leu Ser 615

1847 CAT TCT TTT TCT GTT TTC TGT TTA TTA AGA TGT TCT TCA GTT TGT  
1891

616 His Ser Phe Ser Val Phe Cys Leu Leu Arg Cys Ser Ser Val Cys 630

1892 GAC ATT TAA GTG ATT TTA TAG TAT TTT TTT GTA AAC TTT TTA GAA  
1936

631 Asp Ile **End** Val Ile Leu **End** Tyr Phe Phe Val Asn Phe Leu Glu 645

1937 ATA AAA AAT GAG CAG AAA CAG AAT ATC AAA AAC CCT TTA TTA TTT  
1981

646 Ile Lys Asn Glu Gln Lys Gln Asn Ile Lys Asn Pro Leu Leu Phe 660

1982 ATT CTT AAT CAA ATC AAC CAT CTC CTC AAT TGT TAT CTC ATT AAA  
2026

661 Ile Leu Asn Gln Ile Asn His Leu Leu Asn Cys Tyr Leu Ile Lys 675

2027 TGT GTG AAT TGC CAG GTT GCA TCC TTT AAT TTG AAG TAA TTC ATT  
2071

676 Cys Val Asn Cys Gln Val Ala Ser Phe Asn Leu Lys **End** Phe Ile 690

2072 AAC AGT CAT TTC TGA GGC AAT TCC TAT TGG AGT AGC ACC AGC TGA  
2116

691 Asn Ser His Phe **End** Gly Asn Ser Tyr Trp Ser Ser Thr Ser **End** 705

2117 TAA TGC AGA ATG AAT ACC TGA AAT AGT ATC TTC AAA TAC AAT ACA  
2161

706 **End** Cys Arg Met Asn Thr **End** Asn Ser Ile Phe Lys Tyr Asn Thr 720

2162 ATG AGA AAT ACT AAC TCC TAA TTT CTT AGA AGC TTT TAA ATA AAT  
2206

721 Met Arg Asn Thr Asn Ser **End** Phe Leu Arg Ser Phe **End** Ile Asn 735

2207 GTC AGG AGC AGG TTT ACC TTT AAA AGT AAA ATC ATT AAA AAT AAT  
2251

736 Val Arg Ser Arg Phe Thr Phe Lys Ser Lys Ile Ile Lys Asn Asn 750

2252 TTT ATC AAT ATC AAA CCA TTC TTC CAA GTG GTA TTT TTG AAT AAA  
2296

751 Phe Ile Asn Ile Lys Pro Phe Phe Gln Val Val Phe Leu Asn Lys 765

2297 CAC TTG AAC ATT TCC CCA ATC ACT TGA AGT GGC AAT AGT AAA AGG  
2341

766 His Leu Asn Ile Ser Pro Ile Thr **End** Ser Gly Asn Ser Lys Arg 780

2342 AAT ATT ACA TTT TTT TAA TGC CTC AAA AAG ATT AAT TGC ACC ATC  
2386

781 Asn Ile Thr Phe Phe **End** Cys Leu Lys Lys Ile Asn Cys Thr Ile 795

2387 ACA TAA TTT TAT ATC ACT TTT CAT TAA CAT AGT TCT ATA TAA ATT  
2431

796 Thr **End** Phe Tyr Ile Thr Phe His **End** His Ser Ser Ile **End** Ile 810

2432 TTC TTT TTC TTC AGC ATA TTT CTT TGC ATC TTC ATC ACT TAT TTC 2476  
811 Phe Phe Phe Phe Ser Ile Phe Leu Cys Ile Phe Ile Thr Tyr Phe 825

2477 TTT 2479

826 Phe 826

>gb|DS571171.1|:11243-13723 *Entamoeba histolytica* HM-1:IMSS scf\_1104750517413  
genomic scaffold, whole genome shotgun sequence Frame 3

3 AGA TTT AAA AAA TAA ATG ATA TGA TGT CTA AAT AAA AAT AGA AAA 47  
0 Arg Phe Lys Lys **End** Met Ile **End** Cys Leu Asn Lys Asn Arg Lys 14

48 TTG ATA TTT TAT TTT TAT GAA AAT AAC GAG TAT AAT CTA TGA GAT 92  
15 Leu Ile Phe Tyr Phe Tyr Glu Asn Asn Glu Tyr Asn Leu **End** Asp 29

93 TAT TCA TTT CAT TAT TGT CAA TTT TAT TAT TAA TGT CAA ACC ACA 137  
30 Tyr Ser Phe His Tyr Cys Gln Phe Tyr Tyr **End** Cys Gln Thr Thr 44

138 CTT TAT GAC AGA AGA AGT AAT TTT TTC ATT AAA TTA AAC TAA TGT 182  
45 Leu Tyr Asp Arg Arg Ser Asn Phe Phe Ile Lys Leu Asn **End** Cys 59

183 TAA ATC CTC GAT AAA TTA ATT TTT AAT TTC CTA AGT CAA TAT AAT 227  
60 **End** Ile Leu Asp Lys Leu Ile Phe Asn Phe Leu Ser Gln Tyr Asn 74

228 AAA TAT TCT TCA TTT TGG TGA TAT GAG AAG AAA TTA TAC ATT TTT 272  
75 Lys Tyr Ser Ser Phe Trp **End** Tyr Glu Lys Lys Leu Tyr Ile Phe 89

273 TAA GAA GAT TGG TAA ACG CCA TTA TGT GAT GAA TAG TAC ATT TTA  
317  
90 **End** Glu Asp Trp **End** Thr Pro Leu Cys Asp Glu **End** Tyr Ile Leu 104

318 AAA CTT TAT GTC TTT CAA TTT CTG TTA GTC AGT TAA GTG AAA CAA  
362  
105 Lys Leu Tyr Val Phe Gln Phe Leu Leu Val Ser **End** Val Lys Gln 119

363 TGT TAT TTT ATA AAT TAA TAT TAT TTT CTA TAA GAT ATT GCC ATA 407  
120 Cys Tyr Phe Ile Asn **End** Tyr Tyr Phe Leu **End** Asp Ile Ala Ile 134

408 TTA ATA AAC AAT GGA ATT TTC ATT TTA TTG AAC TTT AAG AGA ACA  
452  
135 Leu Ile Asn Asn Gly Ile Phe Ile Leu Leu Asn Phe Lys Arg Thr 149

453 AAG ATT AAT TAG AGT ATA TGT ATT TAA AAG ACT AAA TGT TGG TGG  
497  
150 Lys Ile Asn **End** Ser Ile Cys Ile **End** Lys Thr Lys Cys Trp Trp 164

498 TAA GAG TTT TTT AGA AAA GAG TTA ATT AAC TCA AAG GTA TTG AAG  
542  
165 **End** Glu Phe Phe Arg Lys Glu Leu Ile Asn Ser Lys Val Leu Lys 179

543 AAA GAA GTG TTT TGA ATA ACT TCA TTG TAT TGG TAG TTA ATT AAA  
587  
180 Lys Glu Val Phe **End** Ile Thr Ser Leu Tyr Trp **End** Leu Ile Lys 194

588 ATG AAA TAA AAG ACT CTC GTT ATA AGT AGG AAG ATG AAG AGC AAC  
632  
195 Met Lys **End** Lys Thr Leu Val Ile Ser Arg Lys Met Lys Ser Asn 209

633 ATT CAT TAG AAA AAT TGA TTT CAT TGC ATA ATA TTA TTT ATT GAA 677  
210 Ile His **End** Lys Asn **End** Phe His Cys Ile Ile Leu Phe Ile Glu 224

678 TAA TTT TTT AAT TCT TCT ATC ATA AAA AAT ACA AAA AAA TGA ATA 722  
225 **End** Phe Phe Asn Ser Ser Ile Ile Lys Asn Thr Lys Lys **End** Ile 239

723 AAT TCA ATA ATA TAA TAA ATC TCA TTT AGA AAA AGT ATA GTG CAG  
767  
240 Asn Ser Ile Ile **End End** Ile Ser Phe Arg Lys Ser Ile Val Gln 254

768 GAA CAA AAC GAG TAT TTC CAT TAA AAC CAA CAA ATG TCT GTG GTT  
812  
255 Glu Gln Asn Glu Tyr Phe His **End** Asn Gln Gln Met Ser Val Val 269

813 GTA TCA CTA ATT CTC TAC ACA TAG GAC ATC TTG GTT GTT GAA TAA  
857  
270 Val Ser Leu Ile Leu Tyr Thr **End** Asp Ile Leu Val Val Glu **End** 284

858 GCC ATT TAA AAA TAC ATT CTT CAC AAT AAA CAT GAC CAC ATT TTA  
902  
285 Ala Ile **End** Lys Tyr Ile Leu His Asn Lys His Asp His Ile Leu 299

903 ACT TAA TTG GAC GAT TAA CTG TGT CTT GAC AAA TTA AGC ACA TTT  
947  
300 Thr **End** Leu Asp Asp **End** Leu Cys Leu Asp Lys Leu Ser Thr Phe 314

948 TGT CTT CTA ATG AAT CTA CGG TTA CTG AAG TAC CAA ACA TAT TGT  
992  
315 Cys Leu Leu Met Asn Leu Arg Leu Leu Lys Tyr Gln Thr Tyr Cys 329

993 TTT GAG TGA AAA AGG TTT TAA GAA CTT TAA AGA AAC AAG AAA GAA  
1037  
330 Phe Glu **End** Lys Arg Phe **End** Glu Leu **End** Arg Asn Lys Lys Glu 344

1038 AAT TAA CAA ATC CAA GAC AAC GTT CAA ACA CAT AAA GCC ACG TTA  
1082  
345 Asn **End** Gln Ile Gln Asp Asn Val Gln Thr His Lys Ala Thr Leu 359

1083 TTG GAT ATA TAA CAA TAT AAC TAA TCC ATT GGT TGG TTA TTG AAG  
1127  
360 Leu Asp Ile **End** Gln Tyr Asn **End** Ser Ile Gly Trp Leu Leu Lys 374

1128 TGT ATG AAA TAA GAT AAT TAT AAA TAA TAA AAG TAG GAA GAA TAA  
1172  
375 Cys Met Lys **End** Asp Asn Tyr Lys **End End** Lys End Glu Glu **End** 389

1173 CTC TTA TAG ACA AAG TAA GTG ATT CTA TCA TAG AGA GTA ATT TAC  
1217  
390 Leu Leu **End** Thr Lys **End** Val Ile Leu Ser **End** Arg Val Ile Tyr 404

1218 ATA ATA ATA ATA TAT TTT TAA CTA AAA ATA TTG TTA AAA CTT TTA  
1262  
405 Ile Ile Ile Ile Tyr Phe **End** Leu Lys Ile Leu Leu Lys Leu Leu 419

1263 GAT AAT AAT TTA TAT AAC GGT AAA TAC AGT CAC ATA GAT ATA AAT  
1307  
420 Asp Asn Asn Leu Tyr Asn Gly Lys Tyr Ser His Ile Asp Ile Asn 434

1308 AAA TGA ATA AAT CAC TAA AAG AAT TTG GAA TAA CAG TAA TAT CTA  
1352

435 Lys **End** Ile Asn His **End** Lys Asn Leu Glu **End** Gln **End** Tyr Leu 449

1353 TCA TAT CAG TTA TTC CTA TTT GCC ACA CCT TTA TAA TAA ATA ATA  
1397

450 Ser Tyr Gln Leu Phe Leu Phe Ala Thr Pro Leu **End End** Ile Ile 464

1398 ACA TAG AAG GAA TAC AAT AAA CTA ATA TCC TTA TTT TAT TTT CCC  
1442

465 Thr **End** Lys Glu Tyr Asn Lys Leu Ile Ser Leu Phe Tyr Phe Pro 479

1443 CAG TAT TTA CAT ATT GTG TAA CTA ACT CAG TTA AAT GAT AAT GTT  
1487

480 Gln Tyr Leu His Ile Val **End** Leu Thr Gln Leu Asn Asp Asn Val 494

1488 GAA TGA AAT CAA CTA TAA TAA ATA AAG TAT AAA AAA TAT GAC TAA  
1532

495 Glu **End** Asn Gln Leu **End End** Ile Lys Tyr Lys Lys Tyr Asp **End** 509

1533 AGA AAA AGA ATA ATA TAA CTA CTA TAT AAG ACC CAA AAC CTG AAT  
1577

510 Arg Lys Arg Ile Ile **End** Leu Leu Tyr Lys Thr Gln Asn Leu Asn 524

1578 CAT AAT CAT TAT TTA TAT AAT CAT TAT CAC CAT CAT TAT TAT TAT  
1622

525 His Asn His Tyr Leu Tyr Asn His Tyr His His His Tyr Tyr Tyr 539

1623 TAT TTT GGT TGT TTG GTT GTT GTT CAT TTC CTG TAT GAG GTA CTT  
1667

540 Tyr Phe Gly Cys Leu Val Val Val His Phe Leu Tyr Glu Val Leu 554

1668 CAT TTA ATT GAG TTA AAC CTT CTT CTC TCA AAT TAA CTT CAT GTT  
1712

555 His Leu Ile Glu Leu Asn Leu Leu Leu Ser Asn **End** Leu His Val 569

1713 CAT CAA CAT TTC CCA TTT CAA TTT CGT GTT CAA ATT TTG TGT CTT  
1757

570 His Gln His Phe Pro Phe Gln Phe Arg Val Gln Ile Leu Cys Leu 584

1758 GGT TTT CAT TAG TAT TTA ATG AAT TTA TAT GAT TAT TTT CAT GAG  
1802

585 Gly Phe His **End** Tyr Leu Met Asn Leu Tyr Asp Tyr Phe His Glu 599

1803 TGT CTA TAC AAC TCA ATT TAT TTG TAC AGA CAA TAT CAC TAT CAC  
1847

600 Cys Leu Tyr Asn Ser Ile Tyr Leu Tyr Arg Gln Tyr His Tyr His 614

1848 ATT CTT TTT CTG TTT TCT GTT TAT TAA GAT GTT CTT CAG TTT GTG  
1892

615 Ile Leu Phe Leu Phe Ser Val Tyr **End** Asp Val Leu Gln Phe Val 629

1893 ACA TTT AAG TGA TTT TAT AGT ATT TTT TTG TAA ACT TTT TAG AAA  
1937

630 Thr Phe Lys **End** Phe Tyr Ser Ile Phe Leu **End** Thr Phe **End** Lys 644

1938 TAA AAA ATG AGC AGA AAC AGA ATA TCA AAA ACC CTT TAT TAT TTA  
1982

645 **End** Lys Met Ser Arg Asn Arg Ile Ser Lys Thr Leu Tyr Tyr Leu 659

1983 TTC TTA ATC AAA TCA ACC ATC TCC TCA ATT GTT ATC TCA TTA AAT  
2027

660 Phe Leu Ile Lys Ser Thr Ile Ser Ser Ile Val Ile Ser Leu Asn 674

2028 GTG TGA ATT GCC AGG TTG CAT CCT TTA ATT TGA AGT AAT TCA TTA  
2072

675 Val **End** Ile Ala Arg Leu His Pro Leu Ile **End** Ser Asn Ser Leu 689

2073 ACA GTC ATT TCT GAG GCA ATT CCT ATT GGA GTA GCA CCA GCT GAT  
2117

690 Thr Val Ile Ser Glu Ala Ile Pro Ile Gly Val Ala Pro Ala Asp 704

2118 AAT GCA GAA TGA ATA CCT GAA ATA GTA TCT TCA AAT ACA ATA CAA  
2162

705 Asn Ala Glu **End** Ile Pro Glu Ile Val Ser Ser Asn Thr Ile Gln 719

2163 TGA GAA ATA CTA ACT CCT AAT TTC TTA GAA GCT TTT AAA TAA ATG  
2207

720 **End** Glu Ile Leu Thr Pro Asn Phe Leu Glu Ala Phe Lys **End** Met 734

2208 TCA GGA GCA GGT TTA CCT TTA AAA GTA AAA TCA TTA AAA ATA ATT  
2252

735 Ser Gly Ala Gly Leu Pro Leu Lys Val Lys Ser Leu Lys Ile Ile 749

2253 TTA TCA ATA TCA AAC CAT TCT TCC AAG TGG TAT TTT TGA ATA AAC  
2297

750 Leu Ser Ile Ser Asn His Ser Ser Lys Trp Tyr Phe **End** Ile Asn 764

2298 ACT TGA ACA TTT CCC CAA TCA CTT GAA GTG GCA ATA GTA AAA GGA  
2342

765 Thr **End** Thr Phe Pro Gln Ser Leu Glu Val Ala Ile Val Lys Gly 779

2343 ATA TTA CAT TTT TTT AAT GCC TCA AAA AGA TTA ATT GCA CCA TCA  
2387

**780 Ile Leu His Phe Phe Asn Ala Ser Lys Arg Leu Ile Ala Pro Ser 794**

**2388 CAT AAT TTT ATA TCA CTT TTC ATT AAC ATA GTT CTA TAT AAA TTT  
2432**

**795 His Asn Phe Ile Ser Leu Phe Ile Asn Ile Val Leu Tyr Lys Phe 809**

**2433 TCT TTT TCT TCA GCA TAT TTC TTT GCA TCT TCA TCA CTT ATT TCT 2477  
810 Ser Phe Ser Ser Ala Tyr Phe Phe Ala Ser Ser Ser Leu Ile Ser 824**

**2478 TTA 2480**

**825 Leu 825**

Figure S1: Translated nucleotide of the EhslnRNA transcript. Diagrammatic representation of all the three frames of EhslnRNA transcript translated using Bioedit program to look for ORFs in the gene. All the three frames displayed multiple stop codons (End shown in red) in the transcript. Each codon is read as left nucleotide, top nucleotide and right nucleotide.











Figure S2. Multiple alignment of EhsIncRNA gene sequence from *Entamoeba histolytica* HM1:IMSS with other strains of *Entamoeba histolytica*. Genome databases of different strains of *E. histolytica*; *E. histolytica* Rahman, *E. histolytica* DS4-868, *E. histolytica* MS96-3382, *E. histolytica* HM-3:IMSS, *E. histolytica* KU-27, *E. histolytica* HM-1:IMSS-A, *E. histolytica* HM1:IMSS-B, *E. histolytica* KU-48, *E. histolytica* KU-50 , *E. histolytica* HM1-CA respectively available in amoebadb using EhsIncRNA sequence as query. The figure shows the multiple alignment of all these sequences retrieved from the search and alignment done using freely available online multiple sequence alignment tool Clustal omega. The gene shows high level of conservation among the different strains of *E. histolytica* indicating its importance in the parasite. Conserved nucleotides are marked with asterisk. Identical nucleotides marked with boxes.

gb|DS571171.1|:11243-13723  
JH929967  
DS548805  
EmLa\_scaffold00714  
EINV\_1042

```
10 20 30 40 50 60 70
AGAGATTTAAAAATAAATGATGATGCTCAAAATAAAAAAGAAAATTGATATTTTATTTTATGAAAATAACGAG
AGAGATTTAAAAATAAATGATGCTCAAAATAAAAAAGAAAATTGATATTTTATTTTATGAAAATAACGAG
```

gb|DS571171.1|:11243-13723  
JH929967  
DS548805  
EmLa\_scaffold00714  
EINV\_1042

```
110 120 130 140 150 160 170
TCATTATTGTCAAATTTTATTAATGTCAAAACACACTTTATGACAGAAAGTAATTTTTTCATTAATTAACCT
TCATTATTGTCAAATTTCCATTCTAATGTTAAAACACACTTTATGACAGAAAGTAATTTTTTCATTAATTAACCT
```

gb|DS571171.1|:11243-13723  
JH929967  
DS548805  
EmLa\_scaffold00714  
EINV\_1042

```
210 220 230 240 250 260 270
AATTAATTTTTAATTTCTAAGTCAATATAATAAATATTTCTTCA TTTTGGTGATGAGAAAGAAATATACATTTT
AATTAATTTTTAATTTCTAAGTCAATATAATAAATATTTCTTCA TTTTGGTGGTATGAGAAAGGGTTGTACATTT
```

gb|DS571171.1|:11243-13723  
JH929967  
DS548805  
EmLa\_scaffold00714  
EINV\_1042

```
310 320 330 340 350 360 370
TATGATGAAAGTCAATTTTAAACCTTTATGCTTTTCAATTTCTGTTAGTCAAGTTAAGTGAACAATGTTATTTT
TGTGATGAAAGTCAATTTTAAACCTTTATGCTTTTCAAGTTTCTGTTAGTCAAGTTAAGTGAACAATGTTATTTT
TGTGATGAAAGTCAATTTTAAACCTTTATGCTTTTCAAGTTTCTGTTAGTCAAGTTAAGTGAACAATGTTATTTT
```

gb|DS571171.1|:11243-13723  
JH929967  
DS548805  
EmLa\_scaffold00714  
EINV\_1042

```
410 420 430 440 450 460 470
AGATATTGCCATATTAATAAAACAATGGAATTTTCATTTTATTGAACCTTTAAGAAACAAAGATTAATTAGAGTATA
AGATATTGCCATATTAATAAAACAATGGAATTTTCATTTTATTGAACCTTTAAGAAACAAAGATTAATTAGAGTATA
GATATTGCCATATTAATAAAACAATGGAATTTTCATTTTATTGAACCTTTAAGAAACAAAGATTAATTAGAGTATA
```

gb|DS571171.1|:11243-13723  
JH929967  
DS548805  
EmLa\_scaffold00714  
EINV\_1042

```
510 520 530 540 550 560 570
GTGGTAAGAGTCTTTTAGAAAAGATTAATTAACCTCAAAAGTATTGAAGAAAGAGTATTGAAAGAAAGAG
GTGGTAAGAGTCTTTTAGAAAAGATTAATTAACCTCAAAAGTATTGAAGAAAGAGTATTGAAAGAAAGAG
GTGGTAAGAGTCTTTTAGAAAAGATTAATTAACCTCAAAAGTATTGAAGAAAGAGTATTGAAAGAAAGAG
```

gb|DS571171.1|:11243-13723  
JH929967  
DS548805  
EmLa\_scaffold00714  
EINV\_1042

```
610 620 630 640 650 660 670
TAAAAAGAAATAAAGACTCTCTTATAAGTAGGAAGATGAAGAGCAACATTCATTAGAAAAATTGATTTTCATTTCAT
TAAAAAGAAATAAAGACTCTCTTATAAGTAGGAAGATGAAGAGCAACATTCATTAGAAAAATTGATTTTCATTTCAT
TAAAAAGAAATAAAGACTCTCTTATAAGTAGGAAGATGAAGAGCAACATTCATTAGAAAAATTGATTTTCATTTCAT
```

gb|DS571171.1|:11243-13723  
JH929967  
DS548805  
EmLa\_scaffold00714  
EINV\_1042

```
710 720 730 740 750 760 770
TTAAATTTCTTCTATCATAAAAAATCAAAAAAATGAATAAATTCATAATATAAATAAATCTCATTTAGAAAAAGTA
TTAAATTTCTTCTATCATAAAAAATCAAAAAAATGAATAAATTCATAATATAAATAAATCTCATTTAGAAAAAGTA
TTAAATTTCTTCTATCATAAAAAATCAAAAAAATGAATAAATTCATAATATAAATAAATCTCATTTAGAAAAAGTA
```

gb|DS571171.1|:11243-13723  
JH929967  
DS548805  
EmLa\_scaffold00714  
EINV\_1042

```
810 820 830 840 850 860 870
TTCCATTAAACCAACAAATGCTGTGGTTGATCACTAATTTCTCTACACATAGGACATCTTGGTTGTTGAATAAGC
TTCCATTAAACCAACAAATGCTGTGGTTGATCACTAATTTCTCTACACATAGGACATCTTGGTTGTTGAATAAGC
TTCCATTAAACCAACAAATGCTGTGGTTGATCACTAATTTCTCTACACATAGGACATCTTGGTTGTTGAATAAGC
```

gb|DS571171.1|:11243-13723  
JH929967  
DS548805  
EmLa\_scaffold00714  
EINV\_1042

```
910 920 930 940 950 960 970
ATAAACATGACCAATTTTAACTTAATTGGACGATTAACCTGTGCTTGTGACAAATTAAGCACATTTTGTCTTCTAATG
ATAAACATGACCAATTTTAACTTAATTGGACGATTAACCTGTGCTTGTGACAAATTAAGCACATTTTGTCTTCTAATG
ATAAACATGACCAATTTTAACTTAATTGGACGATTAACCTGTGCTTGTGACAAATTAAGCACATTTTGTCTTCTAATG
```

gb|DS571171.1|:11243-13723  
JH929967  
DS548805  
EmLa\_scaffold00714  
EINV\_1042

```
1010 1020 1030 1040 1050 1060 1070
AACATATT TTTTGGATGAAAAAGGTTTAACT
AACATATT TTTTGGATGAAAAAGGTTTAACT
AACATATT TTTTGGATGAAAAAGGTTTAACT
CATATAATGCATGAATTAATAAGTAATAATAAACAACGTCCTCCAAAGATATTTTATAGTAAAGAAAGCTTCTCA
```

gb|DS571171.1|:11243-13723  
JH929967  
DS548805  
EmLa\_scaffold00714  
EINV\_1042

```
1110 1120 1130 1140 1150 1160 1170
AAATTAACAAATCCAAGACAAACGTTCAAAACACATAAAGCCAAGTTATTGGATATATAACAATATAAATAAATCCATTG
AAATTAACAAATCCAAGACAAACGTTCAAAACACATAAAGCCAAGTTATTGGATATATAACAATATAAATAAATCCATTG
AAATTAACAAATCCAAGACAAACGTTCAAAACACATAAAGCCAAGTTATTGGATATATAACAATATAAATAAATCCATTG
```

gb|DS571171.1|:11243-13723  
JH929967  
DS548805  
EmLa\_scaffold00714  
EINV\_1042

```
1210 1220 1230 1240 1250 1260 1270
TACCTTATTAAAGTAAATAACAATCGAACAATAAACAATATAAACCATGTTCAATGGATACCAACATCAAGTAACTCATCAAT
```

gb|DS571171.1|:11243-13723  
JH929967  
DS548805  
EmLa\_scaffold00714  
EINV\_1042

T A A G A T A A T T T A A A T A A T A A A A G T A G G A A G A A T A A C T C T T A T A G A C A A A G T A A G T G A T T C T A T C A T A G A G A G T A A T T  
T A A G A T A G T T A T A A A T A A A A A G T A G G A A G A A T A A C T C T T A T A G A C A A A G T A A G T G A T T C T A T C A T A G A G A G T A A T T  
T T A G A T A G T T A T A A A T A A A A A G T A G G A A G A A T A A C T C T T A T A G A C A A A G T A A G T G A T T C T A T C A T A G A G A G T A A T T  
T T A T A T A A T T A T A T A G A G A A T A T A A G T T E G C A G A A T A A T T C T T A T C G A T A A A A A C A A T G A T T C G A T C A T T F E A A A T A C T T

1310 1320 1330 1340 1350 1360 1370

gb|DS571171.1|:11243-13723  
JH929967  
DS548805  
EmLa\_scaffold00714  
EINV\_1042

A A C T A A A A A T A T T G T T A A A A C T T T T A G A T A A T A A T T T T A T A T A A C G G T A A A T A C A G T C A C A T A G A T A T A A A T A A A T G A A T G A A  
A A C T A A A A A T A T T G T T A A A A A T T T T A G A T A A T A A T T T A T A T A A C G A T A A A T A C A G T C A C A T A G A T A T A A A T G A A T G A A  
A G T T A A A A A T A T T G T T A A A A G C C T T T A G A T A A T A A T T T A C A T A A C G G T A T A A C A A T C A C A T A G A T A T A A A G T G A A T T A A  
C A T A T A A A A A C A T F E G T F A T G A C T T T C G A A A A A T A A T T T A A T A T A F C G A T A T F C G C A A T C A C A A T A T A A A G A T G A A T T G

1410 1420 1430 1440 1450 1460 1470

gb|DS571171.1|:11243-13723  
JH929967  
DS548805  
EmLa\_scaffold00714  
EINV\_1042

A T A A C A G T A A T A T C T A T C A T A T C A G T T A T T C C T A T T T G C C A C A C C T T T A T A A T A A A T A A C A T A G A A G G A A T A C A A  
T A A C A G T A A T A T C T A T C A T A T C A G C F A T T T C C T A T T T G C C A C A C C T T T A T A A T A A A T A A C A T A G A A G G A A T A C A A  
G T A A C A G T A A T A T C T A T C A T A T C A A T T A T T C C T A T T T G C C A T A C C T T T A T A A T A A A T A A A A C A G A A G G A A T A C A A  
A C A T A G C T A A T F C A T A T A A A T A T A T T A T T T C C A A A T T C C A A A T T C T T A T A C A A A T A A T A A A A T C E A F E G T A T C A A

1510 1520 1530 1540 1550 1560 1570

gb|DS571171.1|:11243-13723  
JH929967  
DS548805  
EmLa\_scaffold00714  
EINV\_1042

T T T C C C C A G T A T T T A C A T A T T G T F A A C T A A C T C A G T T A A A T G A T A A T G T T G A A T G A A A T C A A C T A T A A T A A A T A A A C  
T T T C C C A G T A T T A C A T A T T G T T T A A C T A A C T C A G T T A A A T G A T A A T G T T G A A T G A A A T C A A C T A T A A T A A A T A A A C  
T T T C C C F T A T T T A T A T A C F T G T T T A A C T A A C T C A G T T A A A T A A T A E F G C F G A A T A A A A T C A A C T A T A A T A A A A T T F C  
T T T C T F C A G T A T T T A C F T A T T G T T F A T A A A C T C A G T T A F T F G A F T A T G T T T G A A C A A F A T C A A C A A T F A T A A A A T A T C

1610 1620 1630 1640 1650 1660 1670

gb|DS571171.1|:11243-13723  
JH929967  
DS548805  
EmLa\_scaffold00714  
EINV\_1042

A A A G A A T A A T A T A A C T A C T A T A T A A G C C C A A A A C C G A A T C A T A A T C A T T A T T T A T A A T C A T T A T C A C C A T  
A A A G A A T A A T A T A A C T A C T A T A A G A C C C A A A C C A G A A T C A T A E F C A T T A T T T A T A A T C A T T A T C A C C A T  
A A A C A E F A A T A T A A C T A C T A T G T A F A C C C A A A T C T G A A C T A T A A T C A T T A T T T A C A T A A T C A T T A T C A C C A T T A T  
G A A A A A T A T A F A F T A T A A T A G A E T A A G F A G C A A A A T C T G F T T C A T A A T C

1710 1720 1730 1740 1750 1760 1770

gb|DS571171.1|:11243-13723  
JH929967  
DS548805  
EmLa\_scaffold00714  
EINV\_1042

T T A T T T T G G T T G T T T G G T T G T T C A T T T C C T G T A T G A G G T A C T T C A T T T A A T T G A G T T A A A C C T T C T T C T C T C A A  
T T A T T T T G G T F T T T G G T T G T T C A T T T C C T G T A T G A G G T A C T T C A T T T A A T T G A G T T A A A C C T T C T T C T C T C A A  
T T A T T T T G G T T G T T T G G T T G T F T T C A T T T C C T G T A T G A G G T A F T T C A T T T A A T T G A G T T A A A C C T T C T T C T C T A A

1810 1820 1830 1840 1850 1860 1870

gb|DS571171.1|:11243-13723  
JH929967  
DS548805  
EmLa\_scaffold00714  
EINV\_1042

T T C C C A T T T C A A T T T C G T T C A A A T T T T G T G T C T T G G F T T T C A T T A G T A T T T A A T G A A T T T A T A T G A T T A T T T T C A  
T T C C C A T T T C A A T T T C G T G T T C A A A T T T T G T G T C T T G G C T T T C A T T A G T A T T T A A T G A A T T T A T A T G A T T A T T T T C A  
T T C C C A T T T C A A T T T C F T G T T C A A A T T T T G T G T F T T G G C T T T C A T T A G T A T T T A A T G A A T C F F F A T A T A T T A T T T T F A

1910 1920 1930 1940 1950 1960 1970

gb|DS571171.1|:11243-13723  
JH929967  
DS548805  
EmLa\_scaffold00714  
EINV\_1042

A T T T G T A C A G A C A A T A T C A C T A T C A C A T T C T T T T T C T G T T T T C T G T T T A T T A A G A T G T C T T C A G T T T G T G A C A T T T  
A T T T G T A C A G A C A G T A T C A C T F F C A C A T T C T T T T T C T G T T T T C T G T T T T A A G A T G T C T T C A C F T T T G T G A C A T T T  
A F T T G T A F G E A C A G T A T C A C T A T G C A T T C A T T T T T C T G T T T T C T G T T T A T T A F G E A T G F C T T T C F E T T T G T G A C A T T T

2010 2020 2030 2040 2050 2060 2070

gb|DS571171.1|:11243-13723  
JH929967  
DS548805  
EmLa\_scaffold00714  
EINV\_1042

E F A A A C T T T T T A G A A A T A A A A A A T G A G C A G A A A C A G A A A T C A A A A A C C C T T T A T T A T T T A T T C T T A A T C A A A T C A A  
F A A A C T T T T T A G A A A T A A A A A A T G A G C A G A A A C A G A A A T C A A A A A C C C T T T A T T A T T T A T T C T T A A T C A A A T C A A  
E G F A A C T T T T T A G A A A T A A A A A A A C E F E F A G A A A C A G A A A T C A A A A A C C C T T T A T T A T T T A T T C T T A A T C A A A T C A A

2110 2120 2130 2140 2150 2160 2170

gb|DS571171.1|:11243-13723  
JH929967  
DS548805  
EmLa\_scaffold00714  
EINV\_1042

T T A A A T G T G A A T T G C C A G G T T G C A T C C T T T A A T T T G A A G T A E F T C A T T A A C A G T C A T T T T C T G A G G C A A T T C C T A T  
T T A A A T G T G A A T T G C C A G G T T G C A T C C T T T A A T T T G A A G T A E F T C A T T A A C A G T C A T T T C T G A G G C A A T T C C T A T  
T T A A A T G T A T G A A T T G C F A A A T T G C A T C C T T T A A A C F T T G A A G T A A F T C A T T A A C A G T C A T C F C T G A A E C A A T T C C T A T

2210 2220 2230 2240 2250 2260 2270

gb|DS571171.1|:11243-13723  
JH929967  
DS548805  
EmLa\_scaffold00714  
EINV\_1042

C A G A A T G A A T A C C T G A A A T A G T A T C T T C A A A T C A A A T C A A T G A G A A A T A C F A A C F C C T A A T T T C T T A G A A G G T T T T  
C A G A A T G A A T A C C T G A A A T A G T A T C T T C A A A T C A A A T C A A T G A G A A A T A T T A A C G C C T A A T T T C T T A G A A G G T T T T  
C F E A A T G A A T A C C T G A A A T A G T F T C T T C A A A T C A A A T C A A T G A A A A A T A T F A A C A C C F A A A T T T C T T F E A A G C T T T T

2310 2320 2330 2340 2350 2360 2370

gb|DS571171.1|:11243-13723  
JH929967  
DS548805  
EmLa\_scaffold00714  
EINV\_1042

A C T T T A A A A G T A A A A T C A T T A A A A A T A A T T T A T C A A A T C A A A C C A T T C T T C C A A E F G G T A T T T T G A A T A A A C A  
A C T T T A A A A G T A A A A T C A T T A A A A A T A A T T T A T C A A A T C A A A C C A T T C E F T C C A A A T G G T A T T T T G A A T A A A C A  
A C T T T A A A A G T A A A A T C A T T A A A T A A T T T A T C A A A T C A A A C C A T T C T T C C A A A T G A T A T T T T T G A A T A A A F A

2410 2420 2430 2440 2450 2460 2470

gb|DS571171.1|:11243-13723  
JH929967

G A A G T G G C A A T A G T A A A A G G A A T A T T A C A T T T T T T T A A T G C C T C A A A A G A T T A A T T G C A C C A T C A T A A T T T T A T  
G A A G T G G C A A T A G T A A A A G G A A T A T T A C A T T T T T T T A A T G C C T C A A A A G A T T A A T T G C A C C A T C A T A A T T T T A T

DS548805  
EmLa\_scaffold00714  
EINV\_1042

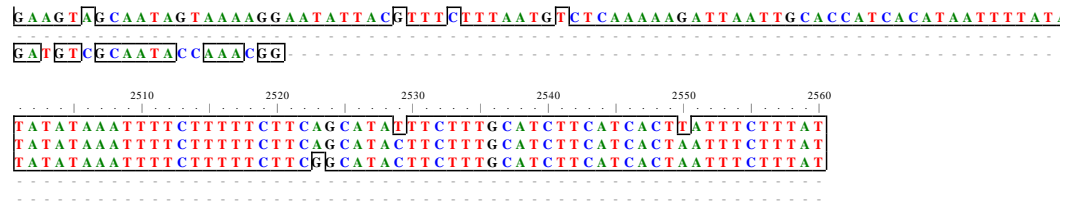

Figure S3. Multiple alignment of EhslncRNA gene with other species of *Entamoeba*. Genome databases of *E. nutalli* P19, *E. dispar* SAW 760, *E. moshkovskii* Laredo, *E. invadens* IP1 respectively were searched using EhslncRNA gene sequence as query in amoebadb. The sequences were retrieved from the search and multiple alignment was done using Clustal omega tool. The figure shows multiple alignment of the sequences of all the above mentioned *Entamoeba* species. The sequence shows high level of similarity across the whole sequence in *E. nutalli* and *E. dispar*. Identical nucleotides are represented by boxes.

**Table S1. List of primers used in the study for cloning in p-Eh-Neo-Luc shuttle vector**

| Name of the oligo | Primer sequence(5'-3')              |
|-------------------|-------------------------------------|
| EhslncR-437 FP    | CGGCTCGAGAAATTAATGAAATTAGAGAAATTAGG |
| EhslncR-45 RP     | CGCGGGTACCAATTAGTTTATTCATACTTAT     |
| EhslncR-33 RP     | GCGGGTACCATACTTATGGTTTGAATATG       |
| EhslncR-118FP     | CGGCTCGAGCTTCAAGACAATGATGGTTTAC     |
| EhslncR-346FP     | CGGCTCGAGCGAAATATAGCATAGTCTGATGAC   |

Annealing temperature - 48°C

**Table S2. List of cloning done in the present study**

| Name of the clone | Insert        | Size of the insert (kb) | Vector         | Size of the vector(kb) | Cloning sites                 | Primer pair                    |
|-------------------|---------------|-------------------------|----------------|------------------------|-------------------------------|--------------------------------|
| EhslncR Pr 1      | EhslncR Pr483 | 0.483                   | p-Eh-NEO-LUC-S | 7.8                    | <i>Xho I</i> and <i>Kpn I</i> | EhslncR-437 FP & EhslncR-45 RP |
| EhslncR Pr 2      | EhslncR Pr470 | 0.470                   | p-Eh-NEO-LUC-S | 7.8                    | <i>Xho I</i> and <i>Kpn I</i> | EhslncR-437 FP & EhslncR-33RP  |
| EhslncR Pr 3      | EhslncR Pr391 | 0.391                   | p-Eh-NEO-LUC-S | 7.8                    | <i>Xho I</i> and <i>Kpn I</i> | EhslncR-346FP & EhslncR-45RP   |
| EhT18 Pr 4        | EhslncR 163   | 0.163                   | p-Eh-NEO-LUC-S | 7.8                    | <i>Xho I</i> and <i>Kpn I</i> | EhslncR-118FP & EhslncR-45RP   |
